# Supplementary material
Source: PubMed Central journal article supplement (PMC9575399)

## Online Supplemental Material

- I. **Page 2** – List of STOP-COVID investigators
- II. **Page 7** – Table S1. List of participating sites
- III. **Page 8** – Table S2. Troponin reference limits for each site
- IV. **Page 9** – Table S3. Associations between pre-existing CVD and inflammatory biomarkers at ICU admission
- VI. **Page 10** – Table S4. Associations between CVD, CAD, and CHF with death and cardiovascular events
- VII. **Page 12** – Table S5. Associations between pre-existing CVD and outcomes by treatment with remdesivir or corticosteroids
- VIII. **Page 13** – Table S6. Baseline characteristics stratified by whether a patient had troponin measured at ICU admission
- IX. **Page 14** – Table S7. Multivariable risk model for myocardial injury
- X. **Page 15** – Table S8. Death and CV events according to myocardial injury status on ICU admission
- XI. **Page 16** – Table S9. Multivariable-adjusted associations between troponin categories with death and cardiovascular events
- XII. **Page 17** – Table S10. Associations between myocardial injury at ICU admission and troponin categories with outcomes adjusted for ICU beds
- XIII. **Page 18** – Table S11. Associations between myocardial injury at ICU admission and troponin categories with outcomes including patients with missing troponin
- XIV. **Page 19** – Table S12. Associations between myocardial injury and outcomes stratified by pre-existing CVD, CAD, and CHF
- XV. **Page 20** – Figure S1. Map of participating sites  
**Page 21** – Figure S2. Association between pre-existing CVD (A) and myocardial injury (B) with a composite of in-hospital death and cardiovascular events within 14 days
- XVI. **Page 22** – Figure S3. Variable importance in predicting 28-day mortality and CV events
- XVII. **Page 23** – Figure S4. Associations between myocardial injury and death and cardiovascular events

## STOP-COVID Investigators

**Baylor College of Medicine:** Carl P. Walther\*, Samaya J. Anumudu

**Baylor University Medical Center:** Justin Arunthamakun\*, Kathleen F. Kopeccky, Gregory P. Milligan, Peter A. McCullough, Thuy-Duyen Nguyen

**Beth Israel Deaconess Medical Center:** Shahzad Shaefi\*, Megan L. Krajewski, Sidharth Shankar, Aameeka Pannu, Juan D. Valencia, Kenneth A. Bauer

**Boston Medical Center:** Sushrut S. Waikar\*, Zoe A. Kibbelaar

**Cook County Health:** Ambarish M. Athavale\*, Peter Hart, Shristi Upadhyay, Ishaan Vohra, Ajiboye Oyintayo

**Cooper University Health Care:** Adam Green\*, Jean-Sebastien Rachoin, Christa A. Schorr, Lisa Shea

**Duke University Medical Center:** Daniel L. Edmonston\*, Christopher L. Mosher

**Hackensack Meridian Health Mountainside Medical Center:** Alexandre M. Shehata\*, Zaza Cohen, Valerie Allusson, Gabriela Bambrick-Santoyo, Noor ul aain Bhatti, Bijal Mehta, Aquino Williams

**Hackensack Meridian Health Hackensack University Medical Center:** Samantha K. Brenner\*, Patricia Walters, Ronaldo C. Go, Keith M. Rose

**Harvard T.H. Chan School of Public Health:** Miguel A. Hernán

**Harvard University:** Amy M. Zhou, Ethan C. Kim, Rebecca Lisk

**Icahn School of Medicine at Mount Sinai:** Lili Chan\*, Kusum S. Mathews\*, Steven G. Coca, Deena R. Altman, Aparna Saha, Howard Soh, Huei Hsun Wen, Sonali Bose, Emily A. Leven, Jing G. Wang, Gohar Mosoyan, Pattharawin Pattharanitima, Emily J. Gallagher

**Indiana University School of Medicine/Indiana University Health:** Allon N. Friedman\*, John Guirguis, Rajat Kapoor, Christopher Meshberger, Katherine J. Kelly

**Johns Hopkins Hospital:** Chirag R. Parikh\*, Brian T. Garibaldi, Celia P. Corona-Villalobos, Yumeng Wen, Steven Menez, Rubab F. Malik, Carmen Elena Cervantes, Samir C. Gautam

**Kings County Hospital Center:** Mary C. Mallappallil\*, Jie Ouyang, Sabu John, Ernie Yap, Yohannes Melaku, Ibrahim Mohamed, Siddhartha Bajracharya, Isha Puri, Mariah Thaxton, Jyotsna Bhattacharya, John Wagner, Leon Boudourakis

**Loma Linda University:** H. Bryant Nguyen\*, Afshin Ahoubim

**Mayo Clinic, Arizona:** Leslie F. Thomas\*, Dheeraj Reddy Sirganagari

**Mayo Clinic, Florida:** Pramod K. Guru\*

**Mayo Clinic, Rochester:** Kianoush Kashani\*, Shahrzad Tehranian

**Medical College of Wisconsin:** Yan Zhou,\* Paul A. Bergl, Jesus Rodriguez, Jatan A. Shah, Mrigank S. Gupta

**MedStar Georgetown University Hospital:** Princy N. Kumar\*, Deepa G. Lazarous, Seble G. Kassaye

**Montefiore Medical Center/Albert Einstein College of Medicine:** Michal L. Melamed\*, Tanya S. Johns. Ryan Mocerino, Kalyan Prudhvi, Denzel Zhu, Rebecca V. Levy, Yorg Azzi, Molly Fisher, Milagros Yunes, Kaltrina Sedaliu, Ladan Golestaneh, Maureen Brogan, Jyotsana Thakkar, Neelja Kumar, Michael J. Ross, Michael Chang

**New York-Presbyterian Queens Hospital:** Ritesh Raichoudhury\*, Akshay Athreya, Mohamed Farag

**New York-Presbyterian/Weill Cornell Medical Center:** Edward J. Schenck\*, Soo Jung Cho, Maria Plataki, Sergio L. Alvarez-Mulett, Luis G. Gomez-Escobar, Di Pan, Stefi Lee, Jamuna Krishnan, William Whalen

**New York University Langone Hospital:** David Charytan\*, Ashley Macina

**Northwestern Memorial Hospital:** Northwestern University Feinberg School of Medicine - Anand Srivastava\*, Alexander S. Leidner, Carlos Martinez, Jacqueline M. Kruser, Richard G. Wunderink, Alexander J. Hodakowski

**Ochsner Medical Center:** Juan Carlos Q. Velez\*, Eboni G. Price-Haywood, Luis A. Matute-Trochez, Anna E. Hasty, Muner MB. Mohamed

**Oregon Health and Science University Hospital:** Rupali S. Avasare\*, David Zonies\*

**Partners Healthcare:** Brigham and Women's Hospital, Brigham and Women's Faulkner Hospital, Massachusetts General Hospital, and Newton Wellesley Hospital – David E. Leaf\*, Shruti Gupta\*, Hanny Al-Samkari, Rebecca Karp Leaf, Rachel Rosovsky, Meghan E. Sise, Erik T. Newman, Samah Abu Omar, Kapil K. Pokharel, Shreyak Sharma, Harkarandeep Singh, Simon Correa, Tanveer Shaukat, Omer Kamal, Wei Wang, Meghan Lee, Ian A. Strohbahn, Jiahua Li, Ariel L. Mueller

**ProMedica Health System:** Roberta E. Redfern,\* Nicholas S. Cairl, Gabriel Naimy, Abeer Abu-Saif, Danyell Hall, Laura Bickley

**Renown Health:** Chris Rowan\*, Farah Madhani-Lovely\*

**Rush University Medical Center:** Vasil Peev\*, Jochen Reiser, John J. Byun, Andrew Vissing, Esha M. Kapania, Zoe Post, Nilam P. Patel, Joy-Marie Hermes

**Rutgers/New Jersey Medical School:** Anne K. Sutherland\*, Ameer Patrawalla, Diana G. Finkel, Barbara A. Danek, Sowminya Arikapudi, Jeffrey M. Paer, Peter Cangialosi, Mark Liotta

**Rutgers/Robert Wood Johnson Medical School:** Jared Radbel\*, Sonika Puri, Jag Sunderram, Matthew T. Scharf, Ayesha Ahmed, Ilya Berim, Jayanth S. Watson, George Karp

**Stanford Healthcare:** Stanford University School of Medicine – Shuchi Anand\*, Joseph E. Levitt, Pablo Garcia

**Temple University Hospital:** Suzanne M. Boyle\*, Rui Song

**Thomas Jefferson University Hospital:** Jingjing Zhang\*, Sang Hoon Woo, Xiaoying Deng, Goni Katz-Greenberg

**Tulane Medical Center:** Moh'd A. Sharshir\*, Vadym V. Rusnak

**United Health Services Hospitals:** Muhammad Imran Ali

**University of Colorado Anschutz Medical Campus:** Anip Bansal\*, Amber S. Podoll, Michel Chonchol, Sunita Sharma, Ellen L. Burnham

**University Hospitals Cleveland Medical Center:** Arash Rashidi\*, Rana Hejal

**University of Alabama-Birmingham Hospital:** Eric Judd\*, Laura Latta, Ashita Tolwani

**University of California-Davis Medical Center:** Timothy E. Albertson\*, Jason Y. Adams

**University of California-Los Angeles Medical Center:** Ronald Reagan-UCLA Medical Center - Steven Y. Chang\*, Rebecca M. Beutler; Santa Monica-UCLA Medical Center – Carl E. Schulze

**University of California-San Diego Medical Center:** Etienne Macedo\*, Harin Rhee

**University of California-San Francisco Medical Center:** Kathleen D. Liu\*, Vasantha K. Jotwani

**University of Chicago Medical Center:** Jay L. Koyner\*

**University of Florida Health-Gainesville:** Chintan V. Shah\*

**University of Florida-Health-Jacksonville:** Vishal Jaikaransingh\*

**University of Illinois Hospital and Health Sciences System:** Stephanie M. Toth-Manikowski\*, Min J. Joo\*, James P. Lash

**University of Kentucky Medical Center:** Javier A. Neyra\*, Nourhan Chaaban, Madona Elias, Yahya Ahmad

**University Medical Center of Southern Nevada:** Rajany Dy\*, Alfredo Iardino, Elizabeth H. Au, Jill H. Sharma

**University of Miami Health System:** Marie Anne Sosa\*, Sabrina Taldone, Gabriel Contreras, David De La Zerda, Hayley B. Gershengorn, Alessia Fornoni

**University of Michigan:** Salim S. Hayek\*, Pennelope Blakely, Hanna Berlin, Tariq U. Azam, Husam Shadid, Michael Pan, Patrick O' Hayer, Chelsea Meloche, Rafey Feroze, Kishan J. Padalia, Jeff Leya, John P. Donnelly, Andrew J. Admon

**University of North Carolina School of Medicine:** Jennifer E. Flythe\*, Matthew J. Tugman, Emily H. Chang

**University of Oklahoma Health Sciences Center:** Brent R. Brown\*

**University of Pennsylvania Health System:** Amanda K. Leonberg-Yoo\*, Ryan C. Spiardi, Todd A. Miano, Meaghan S. Roche, Charles R. Vasquez

**University of Pittsburgh Medical Center:** Amar D. Bansal\*, Natalie C. Ernecoff, Sanjana Kapoor, Siddharth Verma, Huiwen Chen

**University of Tennessee Health Science Center and Memphis VA Medical Center/Methodist University Hospital –** Csaba P. Kovesdy\*, Miklos Z. Molnar\*, Ambreen Azhar

**University of Texas Southwestern Medical Center and Parkland Health and Hospital System:** S. Susan Hedayati\*, Mridula V. Nadamuni, Shani Shastri, Duwayne L. Willett

**University of Vermont Larner College of Medicine:** Samuel A.P. Short

**University of Virginia Health System:** Amanda D. Renaghan\*, Kyle B. Enfield

**University of Washington Medical Center:** Pavan K. Bhatraju\*, A. Bilal Malik

**Vanderbilt University Medical Center:** Matthew W. Semler

**Washington University in St. Louis/Barnes Jewish Hospital:** Anitha Vijayan\*, Christina Mariyam Joy, Tingting Li, Seth Goldberg, Patricia F. Kao

**Wellforce Health System:** Lowell General Hospital - Greg L. Schumaker\*, Tufts Medical Center - Nitender Goyal\*, Anthony J. Faugno, Greg L. Schumaker, Caroline M. Hsu, Asma Tariq, Leah Meyer, Ravi K. Kshirsagar, Daniel E. Weiner

**Westchester Medical Center:** Marta Christov\*, Jennifer Griffiths, Sanjeev Gupta, Aromma Kapoor, Savneek Chugh

**Yale School of Medicine:** Perry Wilson,\* Tanim Arora, Ugochukwu Ugwuowo

\*Site Principal Investigator

**Table S1. List of participating sites**

|                                                                |
|----------------------------------------------------------------|
| <b>Northeast</b>                                               |
| Beth Israel Deaconess Medical Center                           |
| Brigham and Women's Faulkner Hospital                          |
| Brigham and Women's Hospital                                   |
| Cooper University Health Care                                  |
| Hackensack Mountainside Hospital                               |
| Hackensack University Medical Center                           |
| Johns Hopkins Hospital                                         |
| Kings County Hospital Center                                   |
| Lowell General Hospital                                        |
| Massachusetts General Hospital                                 |
| MedStar Georgetown University Hospital                         |
| Montefiore Medical Center                                      |
| Mount Sinai                                                    |
| Newton Wellesley Hospital                                      |
| New York-Presbyterian Queens Hospital                          |
| New York-Presbyterian/Weill Cornell Medical Center             |
| New York University Langone Hospital                           |
| Rutgers/New Jersey Medical School                              |
| Rutgers/Robert Wood Johnson Medical School                     |
| Temple University Hospital                                     |
| Thomas Jefferson University Hospital                           |
| Tufts Medical Center                                           |
| United Health Services Hospitals                               |
| University of Pennsylvania Health System                       |
| University of Pittsburgh Medical Center                        |
| Westchester Medical Center                                     |
| Yale University Medical Center                                 |
| <b>South</b>                                                   |
| Baylor College of Medicine, Houston                            |
| Baylor University Medical Center/Baylor Scott White and Health |
| Duke University Medical Center                                 |
| Mayo Clinic, Florida                                           |
| Memphis VA Medical Center                                      |
| Methodist University Hospital                                  |
| Ochsner Medical Center                                         |
| Tulane Medical Center                                          |
| University of Alabama-Birmingham Hospital                      |
| University of Florida Health-Gainesville                       |
| University of Florida Health-Jacksonville                      |
| University of Miami Health System                              |
| University of North Carolina Medical Center                    |
| University of Texas Southwestern Medical Center                |
| University of Virginia Health System                           |
| <b>Midwest</b>                                                 |
| Barnes-Jewish Hospital                                         |
| Cook County Health                                             |
| Froedtert Hospital                                             |
| Indiana University Health Methodist Hospital                   |
| Mayo Clinic, Rochester                                         |
| Northwestern Memorial Hospital                                 |
| Promedica Health System                                        |
| Rush University Medical Center                                 |
| University Hospitals Cleveland Medical Center                  |
| University of Chicago Medical Center                           |
| University of Illinois Hospital and Health Sciences System     |
| University of Kentucky Hospital                                |
| University of Michigan Hospital                                |
| University of Oklahoma Health Sciences Center                  |
| <b>West</b>                                                    |
| Loma Linda University Medical Center                           |
| Mayo Clinic, Arizona                                           |
| Oregon Health and Science University Hospital                  |
| Renown Health                                                  |
| Stanford Healthcare                                            |
| University of California-Davis Medical Center                  |
| University of California-Los Angeles Medical Center            |
| University of California-San Diego Medical Center              |
| University of California-San Francisco Medical Center          |
| UCHealth University of Colorado                                |
| University Medical Center of Southern Nevada                   |
| University of Washington Medical Center                        |

**Table S2. Troponin Reference Limits for Each Site**

| <b>Institution</b>                                                                    | <b>Study ID Site Code</b> | <b>Troponin (Upper Reference Limit)</b> |
|---------------------------------------------------------------------------------------|---------------------------|-----------------------------------------|
| Brigham and Women's Hospital, Brigham and Women's Faulkner, Newton Wellesley Hospital | BWH, BWF, NWH             | 0.014 ng/mL                             |
| MGH                                                                                   | MGH                       | 0.014 ng/mL                             |
| Mount Sinai                                                                           | MS                        | 0.03 ng/mL                              |
| Northwestern                                                                          | NW                        | 0.04ng/mL                               |
| UCSF                                                                                  | UCSF                      | 0.04 ng/mL                              |
| NYP/Columbia                                                                          | NYP                       | 0.02 ng/mL                              |
| Rush University Medical Center                                                        | RUSH                      | 0.09 ng/mL                              |
| Baylor University Medical Center, Dallas                                              | BUMC                      | 0.05 ng/mL                              |
| Baylor College of Medicine, Houston                                                   | BCMh                      | 0.04 ng/mL                              |
| Albert Einstein/Montefiore                                                            | AEM                       | 0.10 ng/mL                              |
| Colorado                                                                              | UCD                       | 0.04ng/mL                               |
| Hackensack University Medical Center                                                  | HUMC                      | 0.02 ng/mL                              |
| Hackensack Mountainside Hospital                                                      | MSH                       | 0.028 ng/mL                             |
| Beth Israel Deaconess Medical Center                                                  | BID                       | 0.01 ng/mL                              |
| Yale                                                                                  | YALE                      | 1.5 ng/mL                               |
| University of Miami                                                                   | MIA                       | 0.034 ng/mL                             |
| Duke University                                                                       | DUKE                      | 0.019 ng/mL                             |
| Tufts                                                                                 | TUFT                      | 0.03 ng/mL                              |
| University of Alabama, Birmingham                                                     | UAB                       | 0.015 ng/mL                             |
| Rutgers/New Jersey Medical School                                                     | NJMS                      | 0.30 ng/mL                              |
| Temple                                                                                | TEMP                      | 0.04 ng/mL                              |
| Cook County                                                                           | COOK                      | 0.039 ng/mL                             |
| Loma Linda University Medical Center in California                                    | LOMA                      | 0.03 ng/mL                              |
| UCLA                                                                                  | UCLA                      | 0.1 ng/mL                               |
| University of Pennsylvania                                                            | PENN                      | 0.03 ng/mL                              |
| Stanford                                                                              | STAN                      | 0.055 ng/mL                             |
| NYP/Cornell                                                                           | CORN                      | 0.04 ng/mL                              |
| Rutgers/Robert Wood Johnson Medical School                                            | RUTG                      | 0.02 ng/mL                              |
| Cooper Health                                                                         | COOP                      | 0.019 ng/mL                             |
| UC Davis                                                                              | UCD                       | 0.019 ng/mL                             |
| Medical College of Wisconsin                                                          | MCW                       | 0.016 ng/mL                             |
| University of Kentucky                                                                | KTY                       | 0.014 ng/mL                             |
| Oregon Health and Science University                                                  | OHSU                      | 0.80 ng/mL                              |
| Georgetown                                                                            | GTWN                      | 0.047 ng/ml                             |
| Renown Health                                                                         | RENO                      | 0.019 ng/mL                             |
| Tennessee                                                                             | TENN                      | 0.047 ng/ml                             |
| Indiana University–Purdue University Indianapolis                                     | IUPU                      | 0.03 ng/mL                              |
| Oklahoma (Brent Brown)                                                                | OKLA                      | 1.50 ng/mL                              |
| Tulane                                                                                | TUL                       | 0.045 ng/mL                             |
| University of Michigan                                                                | UMI                       | 0.019 ng/mL                             |
| Johns Hopkins                                                                         | JHU                       | 0.04 ng/mL                              |
| University of Southern Nevada Medical Center                                          | UMSN                      | 0.04 ng/mL                              |
| University of Illinois Hospital                                                       | UIC                       | 0.04 ng/mL                              |
| NYU                                                                                   | NYU                       | 0.04 ng/mL                              |
| UCSD                                                                                  | UCSD                      | 0.022 ng/ml                             |
| University of Washington                                                              | UWA                       | 0.04 ng/mL                              |
| Washington University                                                                 | WASU                      | 0.03 ng/mL                              |
| Pittsburgh                                                                            | UPMC                      | 0.045 ng/mL                             |
| Mayo, Florida                                                                         | MCF                       | 0.015 ng/ml                             |
| Mayo, Arizona                                                                         | MCA                       | 0.01 ng/mL                              |
| University of North Carolina                                                          | UNC                       | 0.034 ng/mL                             |
| University Hospitals Cleveland Medical Center                                         | UHCM                      | 0.03 ng/mL                              |
| University of Florida, Gainesville                                                    | UFAG                      | 0.015 ng/ml                             |
| University of Florida, Jacksonville                                                   | UFAJ                      | 0.03 ng/mL                              |
| University of Chicago                                                                 | CHI                       | 0.022 ng/ml                             |
| Ochsner                                                                               | OCHS                      | 0.026 ng/ml                             |
| University of Texas Southwestern                                                      | UTSW                      | 0.022 ng/ml                             |



**Table S3. Associations between pre-existing cardiovascular disease and inflammatory biomarkers at ICU admission**

| <b>Cardiovascular disease</b> |                                      |                |
|-------------------------------|--------------------------------------|----------------|
| <b>Biomarker</b>              | <b><math>\beta^*</math> (95% CI)</b> | <b>P-value</b> |
| White blood cell count        | 10.2 (-4.4, 24.9)                    | 0.17           |
| D-dimer                       | -413 (-2261, 1433)                   | 0.66           |
| C-reactive protein            | -5.4 (-19.8, 9.0)                    | 0.46           |

\* Adjusted for age, sex, race, body mass index, smoking status, diabetes mellitus, hypertension, chronic kidney disease

Abbreviations: ICU, intensive care unit

**Table S4. Associations between CVD, CAD, and CHF with death and cardiovascular events**

|                                                        | Model 0*          |         | Model 1†          |         | Model 2‡          |         | Model 3§          |         |
|--------------------------------------------------------|-------------------|---------|-------------------|---------|-------------------|---------|-------------------|---------|
|                                                        | OR (95% CI)       | P-value |
| <b>Cardiovascular disease</b>                          |                   |         |                   |         |                   |         |                   |         |
| <b>Death within 28 days</b>                            | 1.81 (1.58, 2.06) | < 0.001 | 1.28 (1.11, 1.48) | <0.001  | 1.15 (0.99, 1.34) | 0.07    | 1.15 (0.98, 1.34) | 0.07    |
| <b>Cardiovascular Events</b>                           | 1.29 (1.10, 1.52) | 0.002   | 0.98 (0.83, 1.17) | 0.83    | 0.96 (0.80, 1.15) | 0.65    | 0.95 (0.79, 1.14) | 0.58    |
| Ventricular fibrillation or sustained VT               | 1.68 (1.09, 2.58) | 0.018   | 1.57 (1.00, 2.48) | 0.05    | 1.51 (0.93, 2.44) | 0.09    | 1.50 (0.93, 2.42) | 0.10    |
| Non-sustained VT                                       | 3.05 (1.96, 4.74) | <0.001  | 2.94 (1.83, 4.72) | <0.001  | 2.98 (1.81, 4.92) | <0.001  | 2.98 (1.80, 4.92) | <0.001  |
| Atrial fibrillation or flutter                         | 1.69 (1.36, 2.10) | <0.001  | 1.20 (0.96, 1.51) | 0.11    | 1.18 (0.93, 1.49) | 0.18    | 1.17 (0.92, 1.49) | 0.21    |
| New-onset heart failure                                | 1.69 (1.14, 2.50) | 0.009   | 1.55 (1.02, 2.35) | 0.038   | 1.38 (0.88, 2.14) | 0.16    | 1.38 (0.88, 2.14) | 0.16    |
| Myocarditis or pericarditis                            | 1.31 (0.93, 1.83) | 0.12    | 1.13 (0.79, 1.61) | 0.50    | 1.10 (0.76, 1.60) | 0.62    | 1.09 (0.75, 1.58) | 0.66    |
| Stroke                                                 | 1.37 (0.75, 2.51) | 0.30    | 1.31 (0.70, 2.47) | 0.40    | 1.50 (0.75, 3.01) | 0.25    | 1.34 (0.66, 2.76) | 0.42    |
| <b>Congestive heart failure</b>                        |                   |         |                   |         |                   |         |                   |         |
| <b>Death within 28 days</b>                            | 1.51 (1.26, 1.82) | < 0.001 | 1.22 (1.00, 1.48) | 0.04    | 1.09 (0.88, 1.33) | 0.43    | 1.10 (0.90, 1.36) | 0.35    |
| <b>Cardiovascular Events</b>                           | 1.05 (0.83, 1.33) | 0.66    | 0.91 (0.71, 1.15) | 0.43    | 0.86 (0.67, 1.11) | 0.25    | 0.86 (0.67, 1.11) | 0.25    |
| Ventricular fibrillation or sustained VT               | 1.64 (0.94, 2.86) | 0.08    | 1.69 (0.96, 3.00) | 0.07    | 1.67 (0.92, 3.03) | 0.09    | 1.65 (0.91, 3.00) | 0.10    |
| Non-sustained VT                                       | 2.78 (1.65, 4.68) | <0.001  | 2.57 (1.50, 4.40) | <0.001  | 2.45 (1.39, 4.32) | 0.002   | 2.44 (1.39, 4.30) | 0.002   |
| Atrial fibrillation or flutter                         | 1.31 (0.96, 1.80) | 0.09    | 1.10 (0.80, 1.53) | 0.56    | 1.05 (0.75, 1.49) | 0.77    | 1.05 (0.74, 1.48) | 0.80    |
| New-onset heart failure                                | -                 | -       | -                 | -       | -                 | -       | -                 | -       |
| Myocarditis or pericarditis                            | 1.07 (0.66, 1.73) | 0.80    | 1.01 (0.62, 1.66) | 0.96    | 0.89 (0.52, 1.52) | 0.68    | 0.89 (0.52, 1.51) | 0.66    |
| Stroke                                                 | 1.38 (0.62, 3.08) | 0.43    | 1.32 (0.58, 3.00) | 0.50    | 1.27 (0.48, 3.36) | 0.63    | 1.26 (0.47, 3.34) | 0.64    |
| <b>Coronary artery disease</b>                         |                   |         |                   |         |                   |         |                   |         |
| <b>Death within 28 days</b>                            | 1.79 (1.48, 2.16) | < 0.001 | 1.26 (1.03, 1.53) | 0.022   | 1.16 (0.94, 1.42) | 0.16    | 1.14 (0.93, 1.41) | 0.21    |
| <b>Cardiovascular Events</b>                           | 1.75 (1.41, 2.17) | <0.001  | 1.33 (1.07, 1.66) | 0.011   | 1.35 (1.07, 1.70) | 0.010   | 1.33 (1.06, 1.68) | 0.015   |
| Ventricular fibrillation or sustained VT               | 1.34 (0.73, 2.47) | 0.35    | 1.14 (0.61, 2.13) | 0.68    | 1.04 (0.54, 2.02) | 0.90    | 1.04 (0.53, 2.01) | 0.92    |
| Non-sustained VT                                       | 1.66 (0.89, 3.08) | 0.11    | 1.48 (0.78, 2.80) | 0.23    | 1.51 (0.79, 2.88) | 0.22    | 1.58 (0.78, 2.87) | 0.22    |
| Atrial fibrillation or flutter                         | 1.86 (1.43, 2.42) | <0.001  | 1.23 (0.94, 1.62) | 0.13    | 1.21 (0.92, 1.61) | 0.18    | 1.21 (0.91, 1.60) | 0.20    |
| New-onset heart failure                                | 1.92 (1.26, 2.93) | 0.002   | 1.77 (1.14, 2.74) | 0.011   | 1.53 (0.95, 2.44) | 0.08    | 1.52 (0.95, 2.44) | 0.08    |
| Myocarditis or pericarditis                            | 1.75 (1.15, 2.67) | 0.009   | 1.47 (0.95, 2.27) | 0.08    | 1.54 (0.99, 2.41) | 0.06    | 1.52 (0.98, 2.38) | 0.06    |
| Stroke                                                 | 1.23 (0.52, 2.90) | 0.63    | 1.15 (0.48, 2.76) | 0.75    | 1.48 (0.60, 3.63) | 0.40    | 1.21 (0.46, 3.20) | 0.70    |
| <b>Myocardial injury at ICU admission<sup>  </sup></b> |                   |         |                   |         |                   |         |                   |         |
| <b>Death within 28 days</b>                            | 2.55 (2.17, 2.99) | <0.001  | 2.03 (1.71, 2.41) | <0.001  | 1.94 (1.62, 2.33) | <0.001  | 1.93 (1.61, 2.31) | <0.001  |
| <b>Cardiovascular Events</b>                           | 2.09 (1.73, 2.53) | <0.001  | 1.81 (1.48, 2.21) | <0.001  | 1.88 (1.53, 2.33) | <0.001  | 1.88 (1.52, 2.32) | <0.001  |
| Ventricular fibrillation or sustained VT               | 1.44 (0.86, 2.41) | 0.16    | 1.36 (0.89, 2.34) | 0.27    | 1.47 (0.83, 2.60) | 0.18    | 1.44 (0.81, 2.54) | 0.21    |
| Non-sustained VT                                       | 1.45 (0.86, 2.45) | 0.16    | 1.27 (0.73, 2.20) | 0.40    | 0.94 (0.52, 1.67) | 0.83    | 0.94 (0.52, 1.67) | 0.83    |
| Atrial fibrillation or flutter                         | 1.89 (1.48, 2.41) | <0.001  | 1.35 (1.04, 1.75) | 0.023   | 1.39 (1.06, 1.82) | 0.017   | 1.40 (1.06, 1.83) | 0.016   |
| New-onset heart failure                                | 2.96 (1.93, 4.55) | <0.001  | 3.10 (1.97, 4.85) | <0.001  | 3.11 (1.94, 4.99) | <0.001  | 3.14 (1.95, 5.06) | <0.001  |
| Myocarditis or pericarditis                            | 5.33 (3.42, 8.30) | <0.001  | 5.97 (3.76, 9.46) | <0.001  | 6.46 (3.99, 10.4) | <0.001  | 6.43 (3.97, 10.4) | <0.001  |
| Stroke                                                 | 1.43 (0.70, 2.91) | 0.33    | 1.51 (0.72, 3.19) | 0.28    | 1.29 (0.56, 2.96) | 0.54    | 1.24 (0.54, 2.85) | 0.61    |

\* Model 0 = Unadjusted

† Model 1 = Model 0 + age, sex, race

‡ Model 2 = Model 1 + BMI, smoking, diabetes mellitus, hypertension, chronic kidney disease

§ Model 3 = Model 2 + modified SOFA

¶Models 2 & 3 for myocardial injury adjust for cardiovascular disease

Abbreviations: CAD, coronary artery disease; CHF, congestive heart failure; CI, confidence interval; CVD, cardiovascular disease; ICU, intensive care unit; OR, odds ratio; SOFA, Sequential Organ Failure Assessment; VT, ventricular tachycardia

**Table S5. Associations between pre-existing cardiovascular disease and outcomes by treatment with remdesivir or corticosteroids**

|                        | <b>28-Day Mortality*</b> | <b>Cardiovascular Outcomes*</b> |
|------------------------|--------------------------|---------------------------------|
|                        | P-interaction            | P-interaction                   |
| <b>Remdesivir</b>      | 0.29                     | 0.55                            |
| <b>Corticosteroids</b> | 0.48                     | 0.10                            |

\*Model adjusted for age, sex, race, body mass index, smoking, diabetes mellitus, hypertension, chronic kidney disease, modified SOFA

Abbreviations: SOFA, Sequential Organ Failure Assessment

**Table S6. Baseline characteristics stratified by whether a patient had troponin measured at ICU admission**

|                                      | <b>Troponin measured at ICU admission (N=2,741)</b> | <b>Troponin not measured at ICU admission (N=2,392)</b> | <b>P-value</b> |
|--------------------------------------|-----------------------------------------------------|---------------------------------------------------------|----------------|
| <b>Baseline characteristics</b>      |                                                     |                                                         |                |
| Age, years, mean (SD)                | 62 (15)                                             | 60 (15)                                                 | 0.001          |
| Male, n (%)                          | 1,012 (36.9)                                        | 890 (37.2)                                              | 0.86           |
| Race/Ethnicity, n (%)                |                                                     |                                                         | 0.19           |
| Hispanic/Latino                      | 644 (23.5)                                          | 552 (23.1)                                              |                |
| Non-Hispanic Black                   | 839 (30.6)                                          | 716 (29.9)                                              |                |
| Non-Hispanic White                   | 1,039 (37.9)                                        | 953 (39.8)                                              |                |
| Other                                |                                                     |                                                         |                |
| BMI, kg/m <sup>2</sup> , mean (SD)   | 34 (24)                                             | 33 (20)                                                 | 0.043          |
| Smoking Status, n (%)                |                                                     |                                                         | 0.002          |
| Non-Smoker                           | 1,507 (55.0)                                        | 1,407 (58.8)                                            |                |
| Former Smoker                        | 685 (25.0)                                          | 562 (23.5)                                              |                |
| Current Smoker                       | 130 (4.7)                                           | 132 (5.5)                                               |                |
| Hypertension                         | 1,729 (63.1)                                        | 1,425 (59.6)                                            | 0.011          |
| Diabetes mellitus                    | 1,145 (41.8)                                        | 1,020 (42.6)                                            | 0.55           |
| Chronic kidney disease               | 387 (14.1)                                          | 285 (11.9)                                              | 0.022          |
| mSOFA score                          | 13 (3)                                              | 13 (3)                                                  | 0.28           |
| <b>In-hospital outcomes, n (%)</b>   |                                                     |                                                         |                |
| Death within 28 days                 | 980 (35.8)                                          | 798 (33.4)                                              | <0.001         |
| Cardiovascular events within 14 days | 558 (20.4)                                          | 362 (15.1)                                              | <0.001         |

Abbreviations: BMI, body mass index; ICU, intensive care unit; mSOFA, modified Sequential Organ Failure Assessment score; SD, standard deviation

**Table S7. Multivariable risk model for myocardial injury**

|                                          | OR (95% CI) for myocardial injury at ICU admission | P-value |
|------------------------------------------|----------------------------------------------------|---------|
| Age group, years                         |                                                    |         |
| 18 – 39                                  | 1 [reference]                                      |         |
| 40 – 49                                  | 1.16 (0.77, 1.76)                                  | 0.48    |
| 50 – 59                                  | 1.56 (1.07, 2.27)                                  | 0.02    |
| 60 – 69                                  | 1.96 (1.34, 2.87)                                  | <0.001  |
| 70 – 79                                  | 3.05 (2.04, 4.57)                                  | <0.001  |
| ≥ 80                                     | 5.94 (3.48, 8.66)                                  | <0.001  |
| Female                                   |                                                    | 0.028   |
| Race                                     |                                                    |         |
| Non-Hispanic White                       | 1 [reference]                                      |         |
| Non-Hispanic Black                       | 1.48 (1.17, 1.86)                                  | 0.001   |
| Hispanic                                 | 0.83 (0.65, 1.07)                                  | 0.15    |
| Other                                    | 1.17 (0.92, 1.49)                                  | 0.19    |
| Body mass index group, kg/m <sup>2</sup> |                                                    |         |
| < 25                                     | 1 [reference]                                      |         |
| 25 – 29.9                                | 0.94 (0.75, 1.18)                                  | 0.60    |
| 30 – 34.9                                | 0.90 (0.70, 1.16)                                  | 0.42    |
| 35 – 39.9                                | 1.02 (0.75, 1.38)                                  | 0.92    |
| ≥ 40                                     | 1.00 (0.76, 1.32)                                  | 0.99    |
| Smoking Status                           |                                                    |         |
| Non-Smoker                               | 1 [reference]                                      |         |
| Former Smoker                            | 0.94 (0.77, 1.16)                                  | 0.57    |
| Current Smoker                           | 1.32 (0.90, 1.94)                                  | 0.16    |
| Cardiovascular disease                   | 1.67 (1.33, 2.11)                                  | <0.001  |
| Hypertension                             | 1.26 (1.02, 1.56)                                  | 0.03    |
| Diabetes mellitus                        | 1.17 (0.97, 1.41)                                  | 0.10    |
| Chronic kidney disease                   | 1.41 (1.09, 1.82)                                  | 0.008   |
| ACE-I/ARB                                | 0.94 (0.77, 1.15)                                  | 0.56    |
| Mineralocorticoid receptor antagonist    | 1.35 (0.76, 2.40)                                  | 0.31    |
| Beta-blocker                             | 1.26 (1.02, 1.56)                                  | 0.030   |
| Statin                                   | 0.97 (0.79, 1.19)                                  | 0.77    |
| Aspirin                                  | 1.26 (1.01, 1.57)                                  | 0.039   |
| Anticoagulation                          | 1.28 (0.96, 1.70)                                  | 0.10    |

Abbreviations: ACE-I, angiotensin-converting enzyme inhibitor; ARB, angiotensin-II receptor blocker; CI, confidence interval; ICU, intensive care unit; OR, odds ratio

**Table S8. Death and cardiovascular events according to myocardial injury status on ICU admission**

|                                                    | <b>No myocardial injury at ICU admission*<br/>(n = 1,478)</b> | <b>Myocardial injury at ICU admission*<br/>(n = 1,262)</b> | <b>P-value</b> |
|----------------------------------------------------|---------------------------------------------------------------|------------------------------------------------------------|----------------|
| <b>Death within 28 days, n (%)</b>                 | 384 (26.0)                                                    | 596 (47.2)                                                 | <0.001         |
| <b>Cardiovascular events within 14 days, n (%)</b> | 220 (14.9)                                                    | 338 (26.8)                                                 | <0.001         |
| Ventricular fibrillation or sustained VT           | 27 (1.8)                                                      | 33 (2.1)                                                   | 0.20           |
| Non-sustained VT                                   | 26 (1.8)                                                      | 32 (15.1)                                                  | 0.20           |
| Atrial fibrillation or flutter                     | 125 (9.0) <sup>†</sup>                                        | 174 (15.7) <sup>§</sup>                                    | <0.001         |
| New-onset heart failure                            | 32 (2.4) <sup>‡</sup>                                         | 68 (6.7) <sup>  </sup>                                     | <0.001         |
| Myocarditis or pericarditis                        | 25 (1.7)                                                      | 106 (8.4)                                                  | <0.001         |
| Stroke                                             | 14 (0.9)                                                      | 17 (1.3)                                                   | 0.42           |

\* Among those with troponin data at admission, n = 2,740

<sup>†</sup> Out of 1,396 patients without atrial fibrillation or flutter prior to hospital admission

<sup>‡</sup> Out of 1,349 patients without congestive heart failure prior to hospital admission

<sup>§</sup> Out of 1,110 patients without atrial fibrillation or flutter prior to hospital admission

<sup>||</sup> Out of 1,012 patients without congestive heart failure prior to hospital admission

Abbreviations: ICU, intensive care unit; VT, ventricular tachycardia

**Table S9. Multivariable-adjusted associations between troponin categories with death and cardiovascular events**

|                              | Model 0*          |         | Model 1†          |         | Model 2‡          |         | Model 3§          |         |
|------------------------------|-------------------|---------|-------------------|---------|-------------------|---------|-------------------|---------|
|                              | OR (95% CI)       | P-value |
| <b>Death within 28 days</b>  |                   |         |                   |         |                   |         |                   |         |
| Normal                       | 1.0 [reference]   |         | 1.0 [reference]   |         | 1.0 [reference]   |         | 1.0 [reference]   |         |
| 1 – 2 x URL                  | 1.41 (1.09, 1.83) | 0.008   | 1.14 (0.87, 1.50) | 0.34    | 1.07 (0.81, 1.42) | 0.64    | 1.06 (0.80, 1.40) | 0.70    |
| > 2 – 3 x URL                | 2.20 (1.64, 2.96) | <0.001  | 1.65 (1.21, 2.25) | 0.002   | 1.58 (1.14, 2.19) | 0.006   | 1.57 (1.13, 2.17) | 0.007   |
| > 3 – 4 x URL                | 2.91 (1.97, 4.28) | <0.001  | 2.47 (1.66, 3.69) | <0.001  | 2.40 (1.58, 3.63) | <0.001  | 2.41 (1.59, 3.66) | <0.001  |
| > 4 x URL                    | 3.60 (2.96, 4.40) | <0.001  | 2.87 (2.33, 3.54) | <0.001  | 2.78 (2.23, 3.47) | <0.001  | 2.77 (2.22, 3.45) | <0.001  |
| <b>Cardiovascular events</b> |                   |         |                   |         |                   |         |                   |         |
| Normal                       | 1.0 [reference]   |         | 1.0 [reference]   |         | 1.0 [reference]   |         | 1.0 [reference]   |         |
| 1 – 2 x URL                  | 1.01 (0.73, 1.41) | 0.94    | 0.89 (0.63, 1.25) | 0.51    | 0.90 (0.63, 1.28) | 0.55    | 0.90 (0.63, 1.28) | 0.55    |
| > 2 – 3 x URL                | 1.38 (0.96, 2.01) | 0.08    | 1.17 (0.80, 1.70) | 0.43    | 1.19 (0.80, 1.76) | 0.39    | 1.19 (0.80, 1.76) | 0.40    |
| > 3 – 4 x URL                | 1.71 (1.08, 2.70) | 0.23    | 1.53 (0.96, 2.44) | 0.07    | 1.67 (1.03, 2.70) | 0.038   | 1.67 (1.03, 2.70) | 0.038   |
| > 4 x URL                    | 3.27 (2.62, 4.07) | <0.001  | 2.81 (2.23, 3.53) | <0.001  | 3.00 (2.35, 3.81) | <0.001  | 3.00 (2.35, 3.81) | <0.001  |

\* Model 0 = Unadjusted

† Model 1 = Model 0 + age, sex, race

‡ Model 2 = Model 1 + BMI, smoking, diabetes mellitus, hypertension, chronic kidney disease, cardiovascular disease

§ Model 3 = Model 2 + modified SOFA

Abbreviations: BMI, body mass index; CI, confidence interval; OR, odds ratio; SOFA, Sequential Organ Failure Assessment; URL, upper reference limit of normal



**Table S10. Associations between myocardial injury at ICU admission and troponin categories with outcomes adjusted for institution**

|                                        | Model*            |         |
|----------------------------------------|-------------------|---------|
|                                        | OR (95% CI)       | P-value |
| <b>Death within 28 days</b>            |                   |         |
| <i>Myocardial injury at admission</i>  | 1.89 (1.57, 2.27) | <0.001  |
| <i>Troponin elevation at admission</i> |                   |         |
| Normal                                 | 1.0 [reference]   |         |
| 1 – 2 x URL                            | 1.09 (0.81, 1.45) | 0.58    |
| > 2 – 3 x URL                          | 1.56 (1.12, 2.19) | 0.009   |
| > 3 – 4 x URL                          | 2.51 (1.63, 3.87) | <0.001  |
| > 4 x URL                              | 2.54 (2.02, 3.19) | <0.001  |
| <b>Cardiovascular events</b>           |                   |         |
| <i>Myocardial injury at admission</i>  | 1.79 (1.45, 2.21) | <0.001  |
| <i>Troponin elevation at admission</i> |                   |         |
| Normal                                 | 1.0 [reference]   |         |
| 1 – 2 x URL                            | 0.89 (0.63, 1.28) | 0.54    |
| > 2 – 3 x URL                          | 1.18 (0.79, 1.75) | 0.41    |
| > 3 – 4 x URL                          | 1.67 (1.03, 2.72) | 0.037   |
| > 4 x URL                              | 2.93 (2.30, 3.73) | <0.001  |

\*Model: Generalized linear mixed effects models adjusted for age sex, race, body mass index, smoking, diabetes mellitus, hypertension, chronic kidney disease, cardiovascular disease, modified SOFA, and participating institution (random effect)  
 Abbreviations: CI, confidence interval; OR, odds ratio; SOFA, Sequential Organ Failure Assessment; URL, upper reference limit of normal.

**Table S11. Associations between myocardial injury at ICU admission and troponin categories with outcomes including patients with missing troponin**

|                                        | Model*            |         |
|----------------------------------------|-------------------|---------|
|                                        | OR (95% CI)       | P-value |
| <b>Death within 28 days</b>            |                   |         |
| <i>Myocardial injury at admission</i>  | 1.54 (1.34, 1.78) | <0.001  |
| <i>Troponin elevation at admission</i> |                   |         |
| Normal                                 | 1.0 [reference]   |         |
| 1 – 2 x URL                            | 1.09 (0.81, 1.45) | 0.58    |
| > 2 – 3 x URL                          | 1.56 (1.12, 2.19) | 0.009   |
| > 3 – 4 x URL                          | 2.51 (1.63, 3.87) | <0.001  |
| > 4 x URL                              | 2.54 (2.02, 3.19) | <0.001  |
| <b>Cardiovascular events</b>           |                   |         |
| <i>Myocardial injury at admission</i>  | 1.75 (1.49, 2.06) | <0.001  |
| <i>Troponin elevation at admission</i> |                   |         |
| Normal                                 | 1.0 [reference]   |         |
| 1 – 2 x URL                            | 0.89 (0.63, 1.28) | 0.54    |
| > 2 – 3 x URL                          | 1.18 (0.79, 1.75) | 0.41    |
| > 3 – 4 x URL                          | 1.67 (1.03, 2.72) | 0.037   |
| > 4 x URL                              | 2.93 (2.30, 3.73) | <0.001  |

\*Model: adjusted for age sex, race, body mass index, smoking, diabetes mellitus, hypertension, chronic kidney disease, cardiovascular disease, modified SOFA  
Abbreviations: CI, confidence interval; OR, odds ratio; SOFA, Sequential Organ Failure Assessment; URL, upper reference limit of normal.

**Table S12. Associations between myocardial injury and outcomes stratified by pre-existing CVD, CAD, and CHF**

|                          | Death within 28 days |         |       | Cardiovascular events |         |       |
|--------------------------|----------------------|---------|-------|-----------------------|---------|-------|
|                          | OR* (95% CI)         | P-value | P-Int | OR* (95% CI)          | P-value | P-Int |
| Cardiovascular disease   |                      |         | 0.31  |                       |         | 0.11  |
| No                       | 2.49 (2.06, 3.02)    | <0.001  |       | 2.08 (1.64, 2.63)     | <0.001  |       |
| Yes                      | 2.05 (1.48, 2.85)    | <0.001  |       | 1.36 (0.89, 2.07)     | 0.15    |       |
| Coronary artery disease  |                      |         | 0.67  |                       |         | 0.43  |
| No                       | 2.50 (2.11, 2.97)    | <0.001  |       | 2.09 (1.71, 2.56)     | <0.001  |       |
| Yes                      | 2.23 (1.33, 3.72)    | 0.002   |       | 1.63 (0.91, 2.93)     | 0.10    |       |
| Congestive heart failure |                      |         | 0.10  |                       |         | 0.06  |
| Yes                      | 2.64 (2.22, 3.13)    | <0.001  |       | 2.28 (1.86, 2.78)     | <0.001  |       |
| No                       | 1.70 (1.03, 2.80)    | 0.037   |       | 1.20 (0.64, 2.26)     | 0.57    |       |

\*Based on unadjusted models

Abbreviations: CAD, coronary artery disease; CHF, congestive heart failure; CI, confidence interval; CVD, cardiovascular disease; OR, odds ratio; P-Int, P-value for interaction

Figure S1. Map of participating sites

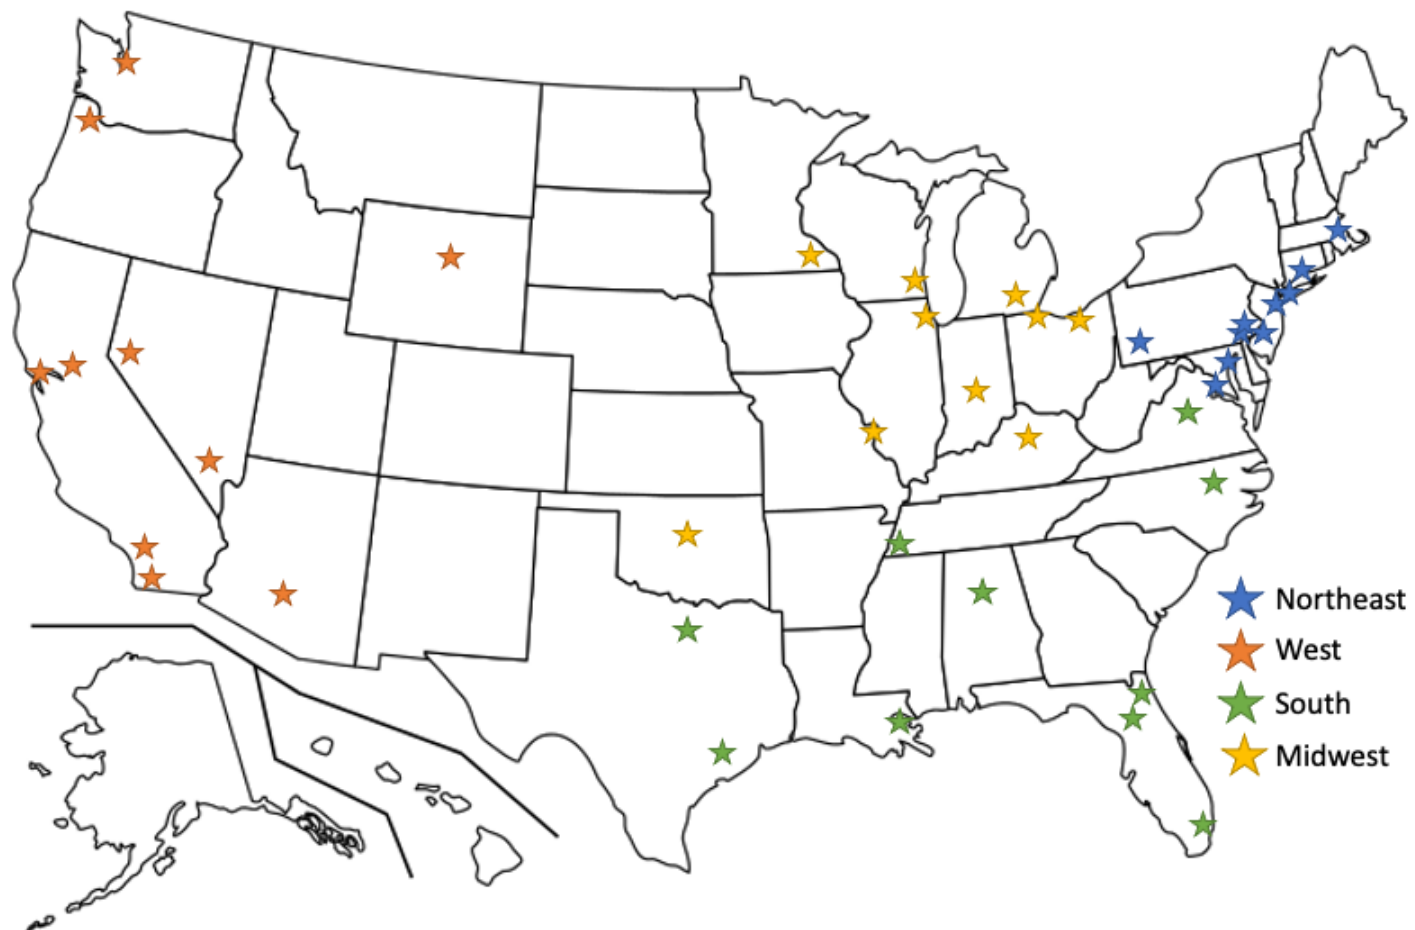

**Figure S2. Association between pre-existing CVD (A) and myocardial injury (B) with a composite of in-hospital death and cardiovascular events within 14 days.** Abbreviations: CVD, cardiovascular disease; SOFA, Sequential Organ Failure Assessment

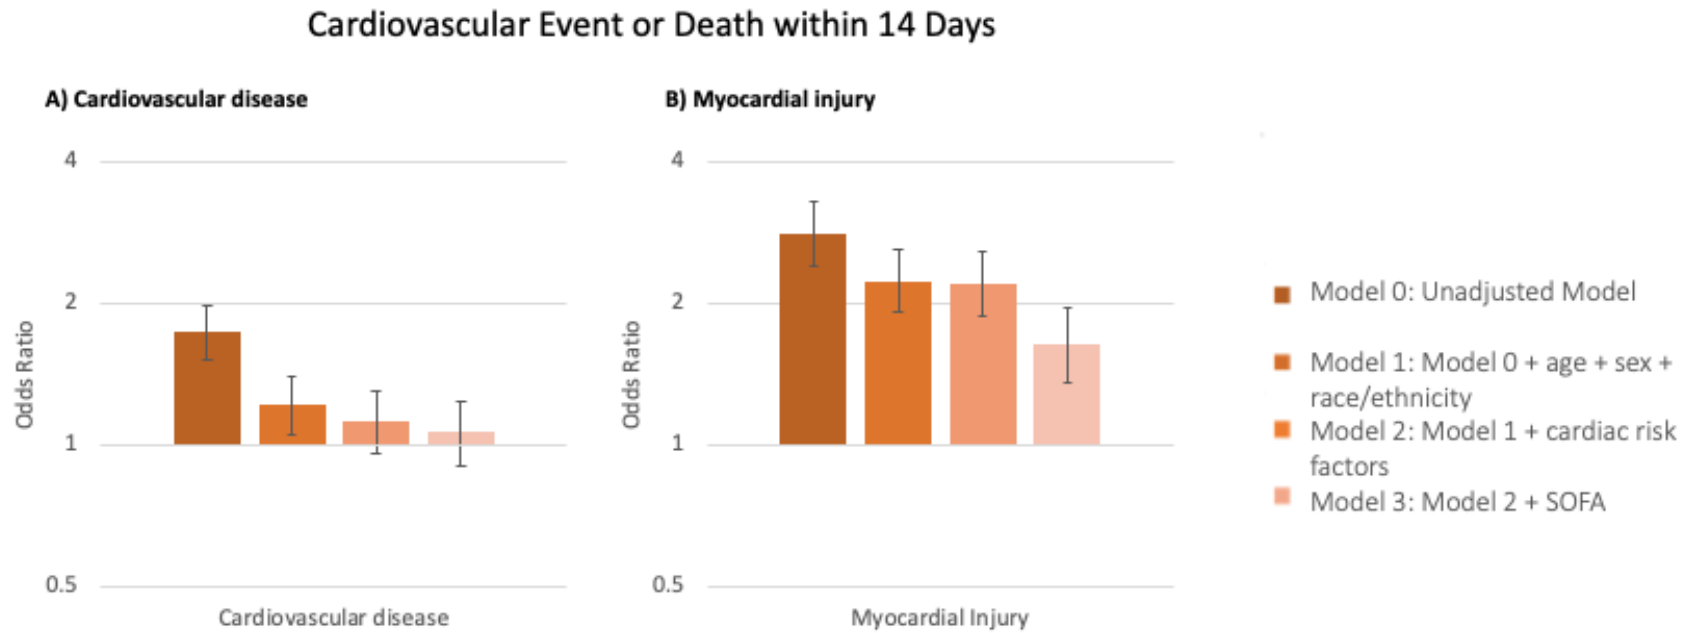

**Figure S3. Variable importance in predicting 28-day mortality and cardiovascular events.** Variable importance plot based on Gini Index using random forest approach using model 2 (adjusted for age, race/ethnicity, sex, smoking status, body mass index, and history of pre-existing diabetes mellitus, hypertension, and chronic kidney disease) for predicting death (Panel A) and cardiovascular events (Panel B).

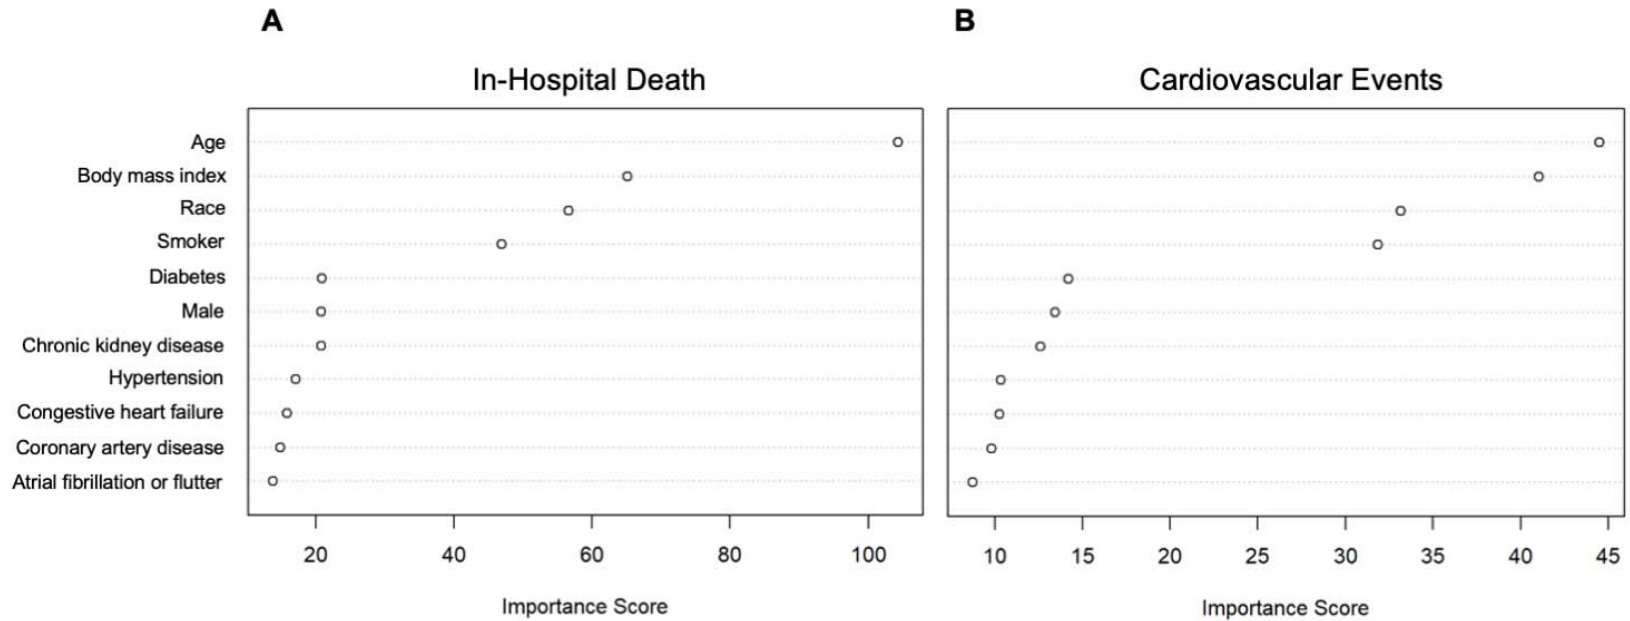

**Figure S4. Associations between myocardial injury and death and cardiovascular events.**  
Abbreviations: SOFA, Sequential Organ Failure Assessment

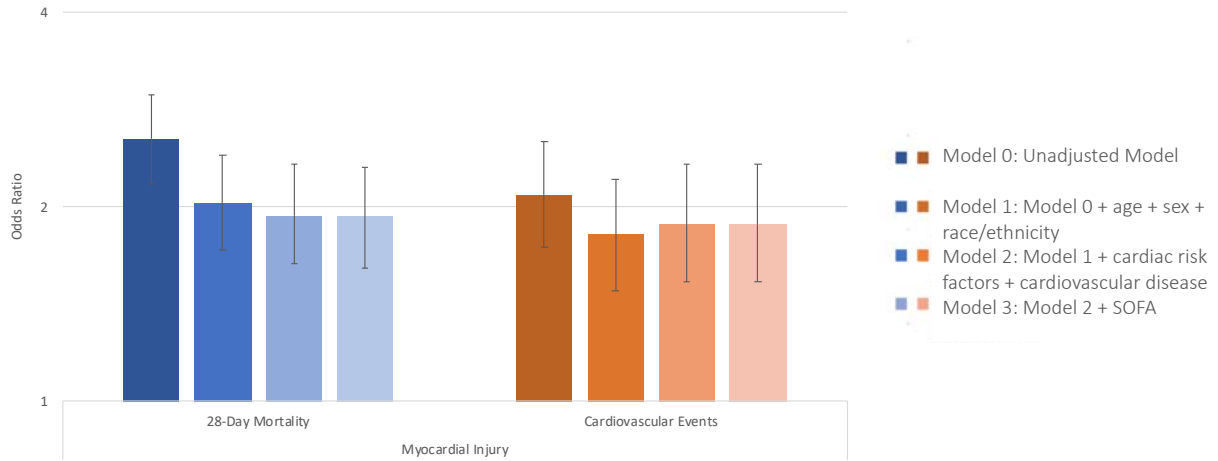

Supplement: hcq-15-e008942-s002.pdf [file hcq-15-e008942-s002.pdf]
